# Supplementary material for: Age is not just a number: Naive T cells increase their ability to persist in the circulation over time
Source: PubMed Central journal article supplement (PMC5894957; doi:10.1371/journal.pbio.2003949), 2018-04-11
Supplement: pbio.2003949.s005.pdf [file pbio.2003949.s005.pdf]

## S1 Figure

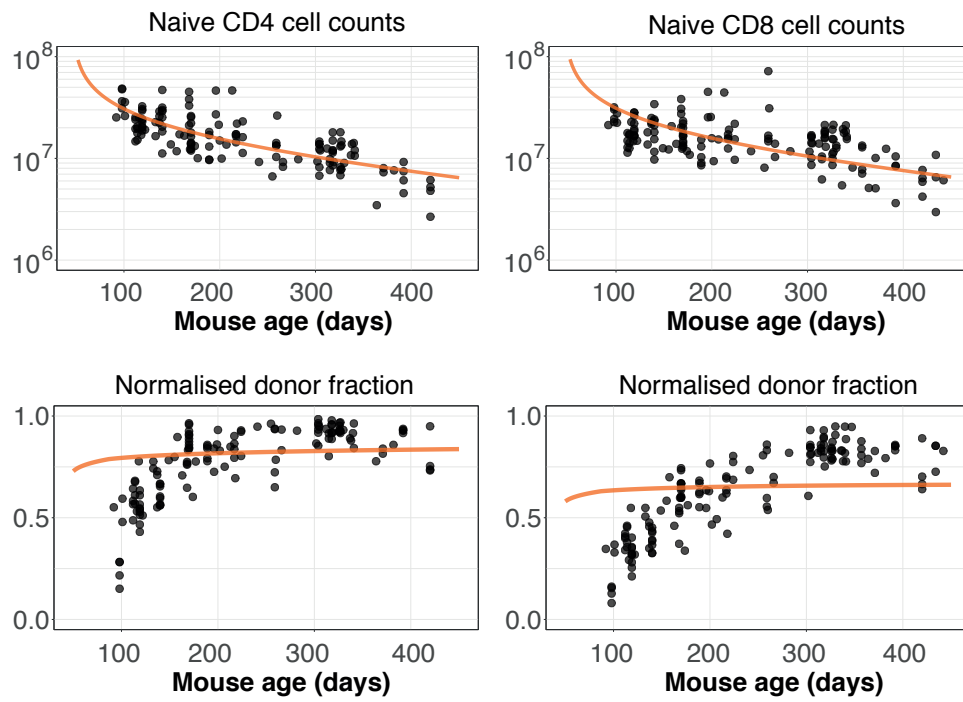

Figure S1: The density-dependent model fails to explain the replacement kinetics in busulfan chimeras. Data are as in Fig 3 in the main text.
